# Supplementary material for: Porosity Estimation of the Permo-Triassic Sherwood Sandstone Group Using BNRM and Petrophysical Models
Source: Copernicus journal article supplement (doi:10.5194/adgeo-65-189-2025), 2025-03-18
Supplement: Supplementary file 1 [file adgeo-65-189-2025-supplement.zip]

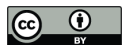

*Supplement of*

## **Porosity Estimation of the Permo-Triassic Sherwood Sandstone Group Using BNRM and Petrophysical Models**

**Sodiq Oguntade et al.**

*Correspondence to:* Sodiq Oguntade (soguntade01@qub.ac.uk)

- adgeo-65-189-2025-supplement-title-page.pdf
- BNMR\_PetrophysicalModels\_Results
  - ArchiePorosity\_Percent.xlsx
  - BNMRPorosity\_Percent.xlsx
  - WaxmanPorosity\_Percent.xlsx

The copyright of individual parts of the supplement might differ from the article licence.
