# Supplementary material for: Porosity Estimation of the Permo-Triassic Sherwood Sandstone Group Using BNRM and Petrophysical Models
Source: Copernicus journal article supplement (doi:10.5194/adgeo-65-189-2025), 2025-03-18
Supplement: Supplementary file 1 [file adgeo-65-189-2025-supplement.zip]

## Sheet: Sheet1
Borehole	Porosity
BH1	10.9449
BH1	10.9454
BH1	10.9457
BH1	10.8239
BH1	10.8244
BH1	11.0728
BH1	11.0736
BH1	11.0739
BH1	11.0746
BH1	11.0758
BH1	12.3708
BH1	12.371
BH1	12.5546
BH1	12.5548
BH1	12.5545
BH1	12.5537
BH1	12.5533
BH1	15.8931
BH1	15.8937
BH1	15.7216
BH1	15.7208
BH1	15.7195
BH1	15.7188
BH1	15.7181
BH1	16.3627
BH1	16.363
BH1	16.4324
BH1	16.4324
BH1	16.4308
BH1	16.4292
BH1	16.4281
BH1	13.6398
BH1	13.6406
BH1	14.1153
BH1	14.116
BH1	14.1162
BH1	14.1169
BH1	14.1169
BH1	12.7512
BH1	12.7521
BH1	12.8198
BH1	12.8212
BH1	12.8217
BH1	12.8222
BH1	12.8225
BH1	11.0406
BH1	11.0407
BH1	11.2406
BH1	11.2407
BH1	11.2413
BH1	11.2416
BH1	11.2416
BH1	12.6707
BH1	12.6707
BH1	12.346
BH1	12.3459
BH1	12.3453
BH1	12.3446
BH1	12.3439
BH1	12.4896
BH1	12.4888
BH1	12.4518
BH1	12.4516
BH1	12.4507
BH1	12.4507
BH1	12.4515
BH1	12.6765
BH1	12.6765
BH1	12.8551
BH1	12.855
BH1	12.8554
BH1	12.857
BH1	12.8575
BH1	15.1084
BH1	15.1084
BH1	15.32
BH1	15.319
BH1	15.3188
BH1	15.3182
BH1	15.3182
BH1	11.1044
BH1	11.1048
BH1	11.253
BH1	11.2526
BH1	11.252
BH1	11.2516
BH1	11.2514
BH1	15.4
BH1	15.4008
BH1	15.4148
BH1	15.4134
BH1	15.4123
BH1	15.4107
BH1	15.4108
BH1	14.9644
BH1	14.9656
BH1	15.5007
BH1	15.5012
BH1	15.5021
BH1	15.5028
BH1	15.5035
BH1	13.167
BH1	13.1678
BH1	12.8853
BH1	12.8849
BH1	12.8847
BH1	12.8834
BH1	12.8825
BH1	17.6404
BH1	17.639
BH1	18.0198
BH1	18.019
BH1	18.0184
BH1	18.0182
BH1	18.018
BH1	15.3981
BH1	15.3978
BH1	15.2731
BH1	15.2739
BH1	15.2748
BH1	15.2755
BH1	15.2738
BH1	15.5117
BH1	15.5111
BH1	15.2224
BH1	15.2227
BH1	15.2224
BH1	15.2244
BH1	15.2238
BH1	13.7338
BH1	13.7348
BH1	14.2013
BH1	14.2026
BH1	14.2037
BH1	14.2053
BH1	14.2045
BH1	12.8804
BH1	12.8811
BH1	12.8863
BH1	12.886
BH1	12.8861
BH1	12.8857
BH1	12.887
BH1	14.4637
BH1	14.4643
BH1	14.1413
BH1	14.1418
BH1	14.1429
BH1	14.142
BH1	14.143
BH1	13.4815
BH1	13.4814
BH1	13.7205
BH1	13.7186
BH1	13.7174
BH1	13.7162
BH1	13.7164
BH1	12.976
BH1	12.9746
BH1	12.8778
BH1	12.8784
BH1	12.8781
BH1	12.8778
BH1	12.8784
BH1	15.2132
BH1	15.2145
BH1	15.2497
BH1	15.2509
BH1	15.2516
BH1	15.2523
BH1	15.2538
BH1	14.3188
BH1	14.3193
BH1	14.4273
BH1	14.4277
BH1	14.4273
BH1	14.4268
BH1	14.4263
BH1	13.8364
BH1	13.8351
BH1	14.0109
BH1	14.0096
BH1	14.0085
BH1	14.0067
BH1	14.0059
BH1	13.6464
BH1	13.6458
BH1	13.5519
BH1	13.5518
BH1	13.5535
BH1	13.5559
BH1	13.5577
BH1	13.6525
BH1	13.6536
BH1	13.894
BH1	13.8938
BH1	13.8945
BH1	13.8953
BH1	13.8946
BH1	12.5484
BH1	12.5476
BH1	12.3111
BH1	12.3109
BH1	12.3107
BH1	12.3101
BH1	12.3092
BH1	15.4773
BH1	15.4782
BH1	15.7291
BH1	15.7286
BH1	15.7279
BH1	15.7294
BH1	15.7306
BH1	14.6417
BH1	14.6424
BH1	14.5622
BH1	14.5622
BH1	14.564
BH1	14.5636
BH1	14.5646
BH1	14.305
BH1	14.3053
BH1	14.7409
BH1	14.7386
BH1	14.737
BH1	14.7361
BH1	14.7358
BH1	13.8215
BH1	13.8211
BH1	13.5857
BH1	13.5845
BH1	13.5841
BH1	13.583
BH1	13.5833
BH1	16.3056
BH1	16.3073
BH1	16.27
BH1	16.2696
BH1	16.2699
BH1	16.2691
BH1	16.2701
BH1	18.8124
BH1	18.8134
BH1	19.4321
BH1	19.4324
BH1	19.4324
BH1	19.4313
BH1	19.4334
BH1	16.131
BH1	16.131
BH1	15.9056
BH1	15.9043
BH1	15.9038
BH1	15.9018
BH1	15.9006
BH1	15.9002
BH1	15.9
BH1	15.9454
BH1	15.9427
BH1	15.9422
BH1	15.9413
BH1	15.943
BH1	15.6901
BH1	15.6906
BH1	15.7195
BH1	15.7199
BH1	15.72
BH1	15.7207
BH1	15.7199
BH1	12.8646
BH1	12.8655
BH1	12.9883
BH1	12.987
BH1	12.9866
BH1	12.9858
BH1	12.984
BH1	14.0344
BH1	14.0354
BH1	14.3576
BH1	14.3582
BH1	14.3588
BH1	14.3579
BH1	14.3578
BH1	15.5142
BH1	15.5149
BH1	15.0412
BH1	15.0422
BH1	15.043
BH1	15.0423
BH1	15.0425
BH1	12.8517
BH1	12.8517
BH1	12.8304
BH1	12.8296
BH1	12.8292
BH1	12.8277
BH1	12.8273
BH1	15.9032
BH1	15.903
BH1	15.9692
BH1	15.9684
BH1	15.9676
BH1	15.9661
BH1	15.9654
BH1	17.0792
BH1	17.0794
BH1	16.6683
BH1	16.6693
BH1	16.669
BH1	16.6687
BH1	16.6693
BH1	10.7751
BH1	10.775
BH1	11.2344
BH1	11.2356
BH1	11.2356
BH1	11.2354
BH1	11.2346
BH1	11.2331
BH1	11.2323
BH1	11.4053
BH1	11.4054
BH1	11.4054
BH1	11.4051
BH1	11.4045
BH1	13.1504
BH1	13.1498
BH1	13.2266
BH1	13.2276
BH1	13.2279
BH1	13.2286
BH1	13.2298
BH1	14.7887
BH1	14.7894
BH1	14.7713
BH1	14.7724
BH1	14.7719
BH1	14.7728
BH1	14.7748
BH1	14.5838
BH1	14.5856
BH1	14.2
BH1	14.1999
BH1	14.1985
BH1	14.1981
BH1	14.1979
BH1	14.4592
BH1	14.4602
BH1	14.5482
BH1	14.548
BH1	14.5465
BH1	14.5449
BH1	14.5448
BH1	13.7528
BH1	13.7539
BH1	13.6813
BH1	13.6815
BH1	13.681
BH1	13.6805
BH1	13.6816
BH1	16.4381
BH1	16.4384
BH1	16.6489
BH1	16.6475
BH1	16.6467
BH1	16.6454
BH1	16.6444
BH1	15.1915
BH1	15.1913
BH1	14.9279
BH1	14.9277
BH1	14.9265
BH1	14.9263
BH1	14.9265
BH1	13.6011
BH1	13.6004
BH1	13.6011
BH1	13.6012
BH1	13.6002
BH1	13.5997
BH1	13.5997
BH1	14.9093
BH1	14.9094
BH1	14.8245
BH1	14.8243
BH1	14.8224
BH1	14.8213
BH1	14.8191
BH1	14.4761
BH1	14.4779
BH1	14.4951
BH1	14.4955
BH1	14.4959
BH1	14.4972
BH1	14.497
BH1	12.066
BH1	12.0663
BH1	11.7793
BH1	11.7799
BH1	11.7802
BH1	11.7794
BH1	11.7796
BH1	13.1171
BH1	13.1175
BH1	12.89
BH1	12.8903
BH1	12.8915
BH1	12.8927
BH1	12.8924
BH1	13.9104
BH1	13.911
BH1	14.1489
BH1	14.1486
BH1	14.1492
BH1	14.1481
BH1	14.1474
BH1	11.6388
BH1	11.6376
BH1	11.4146
BH1	11.4148
BH1	11.4136
BH1	11.413
BH1	11.4125
BH1	10.8913
BH1	10.8911
BH1	10.9581
BH1	10.9572
BH1	10.9561
BH1	10.9567
BH1	10.9564
BH1	12.7848
BH1	12.7846
BH1	13.0223
BH1	13.0221
BH1	13.0227
BH1	13.0226
BH1	13.0235
BH1	12.8789
BH1	12.8803
BH1	12.4729
BH1	12.4736
BH1	12.474
BH1	12.474
BH1	12.4737
BH1	13.1136
BH1	13.1128
BH1	12.9998
BH1	12.9996
BH1	12.9992
BH1	12.9991
BH1	12.998
BH1	14.8658
BH1	14.8653
BH1	15.1292
BH1	15.1303
BH1	15.1312
BH1	15.1319
BH1	15.1312
BH1	12.3569
BH1	12.3574
BH1	12.5076
BH1	12.5091
BH1	12.51
BH1	12.5098
BH1	12.5102
BH1	12.5356
BH1	12.5353
BH1	12.3422
BH1	12.3428
BH1	12.3425
BH1	12.3414
BH1	12.3393
BH1	13.4966
BH1	13.4965
BH1	12.9464
BH1	12.9464
BH1	12.9471
BH1	12.9468
BH1	12.9463
BH1	11.0584
BH1	11.0584
BH1	11.1879
BH1	11.1881
BH1	11.1886
BH1	11.1887
BH1	11.1873
BH1	10.8203
BH1	10.8199
BH1	10.544
BH1	10.5434
BH1	10.5431
BH1	10.5429
BH1	10.5426
BH1	13.6908
BH1	13.6909
BH1	14.4232
BH1	14.4227
BH1	14.4233
BH1	14.4226
BH1	14.4219
BH1	11.6092
BH1	11.6091
BH1	11.4944
BH1	11.4947
BH1	11.4952
BH1	11.4953
BH1	11.4952
BH1	12.1676
BH1	12.1671
BH1	12.1493
BH1	12.1498
BH1	12.1502
BH1	12.1503
BH1	12.1502
BH1	11.479
BH1	11.4787
BH1	11.658
BH1	11.6579
BH1	11.6562
BH1	11.656
BH1	11.656
BH1	11.1309
BH1	11.1309
BH1	11.3055
BH1	11.3052
BH1	11.3055
BH1	11.3057
BH1	11.3061
BH1	11.9689
BH1	11.9698
BH1	11.4491
BH1	11.4487
BH1	11.4487
BH1	11.4486
BH1	11.4488
BH1	12.4626
BH1	12.4636
BH1	12.8647
BH1	12.864
BH1	12.8638
BH1	12.864
BH1	12.865
BH1	13.5592
BH1	13.5597
BH1	13.5115
BH1	13.5106
BH1	13.5104
BH1	13.5092
BH1	13.5086
BH1	10.4095
BH1	10.4092
BH1	10.4786
BH1	10.4782
BH1	10.478
BH1	10.4779
BH1	10.4773
BH1	15.1011
BH1	15.1006
BH1	14.8376
BH1	14.8377
BH1	14.8379
BH1	14.8381
BH1	14.837
BH1	11.1229
BH1	11.1234
BH1	11.2006
BH1	11.2009
BH1	11.2003
BH1	11.2003
BH1	11.1998
BH1	12.5788
BH1	12.579
BH1	12.4049
BH1	12.4054
BH1	12.4041
BH1	12.4042
BH1	12.4048
BH1	13.2833
BH1	13.2835
BH1	13.573
BH1	13.573
BH1	13.5735
BH1	13.5737
BH1	13.5736
BH1	14.4744
BH1	14.4739
BH1	14.6794
BH1	14.679
BH1	14.6797
BH1	14.679
BH1	14.6797
BH1	12.7811
BH1	12.7814
BH1	12.1986
BH1	12.1981
BH1	12.1969
BH1	12.1977
BH1	12.198
BH1	16.2785
BH1	16.2785
BH1	16.9156
BH1	16.9143
BH1	16.9135
BH1	16.9143
BH1	16.9133
BH1	18.1231
BH1	18.1242
BH1	17.7913
BH1	17.7913
BH1	17.792
BH1	17.7912
BH1	17.7906
BH1	16.6027
BH1	16.6024
BH1	16.3822
BH1	16.3831
BH1	16.382
BH1	16.3815
BH1	16.3818
BH1	15.5895
BH1	15.5879
BH1	16.0515
BH1	16.0512
BH1	16.0507
BH1	16.0504
BH1	16.051
BH1	18.8019
BH1	18.8022
BH1	18.4449
BH1	18.4456
BH1	18.4462
BH1	18.4456
BH1	18.444
BH1	16.1364
BH1	16.1359
BH1	16.0552
BH1	16.0557
BH1	16.0552
BH1	16.0565
BH1	16.0567
BH1	14.6754
BH1	14.6761
BH1	14.7624
BH1	14.7637
BH1	14.7658
BH1	14.7683
BH1	14.7683
BH1	18.6685
BH1	18.6679
BH1	18.2412
BH1	18.2397
BH1	18.2386
BH1	18.2376
BH1	18.2362
BH1	16.646
BH1	16.6456
BH1	17.0599
BH1	17.0603
BH1	17.059
BH1	17.06
BH1	17.0597
BH1	18.4714
BH1	18.4717
BH1	18.0332
BH1	18.0332
BH1	18.0327
BH1	18.0315
BH1	18.0324
BH1	14.2487
BH1	14.2496
BH1	14.7371
BH1	14.7371
BH1	14.7369
BH1	14.7366
BH1	14.7362
BH1	16.7703
BH1	16.77
BH1	16.3178
BH1	16.3177
BH1	16.3182
BH1	16.3175
BH1	16.3179
BH1	14.2943
BH1	14.294
BH1	14.5179
BH1	14.5181
BH1	14.5181
BH1	14.5186
BH1	14.5169
BH1	17.5325
BH1	17.5316
BH1	16.8148
BH1	16.8139
BH1	16.8139
BH1	16.8131
BH1	16.812
BH1	23.023
BH1	23.022
BH1	23.6141
BH1	23.6123
BH1	23.6115
BH1	23.6125
BH1	23.6104
BH1	22.2232
BH1	22.2222
BH1	22.4613
BH1	22.4619
BH1	22.4612
BH1	22.4615
BH1	22.4615
BH1	17.6315
BH1	17.6312
BH1	17.6574
BH1	17.6573
BH1	17.6562
BH1	17.6546
BH1	17.6537
BH1	15.5562
BH1	15.5562
BH1	15.1905
BH1	15.1902
BH1	15.1912
BH1	15.1908
BH1	15.1934
BH1	17.8825
BH1	17.8842
BH1	18.2912
BH1	18.2912
BH1	18.2909
BH1	18.2891
BH1	18.2885
BH1	13.6438
BH1	13.6422
BH1	13.5098
BH1	13.5073
BH1	13.5075
BH1	13.5066
BH1	13.5064
BH1	12.8802
BH1	12.8807
BH1	12.8605
BH1	12.8608
BH1	12.861
BH1	12.8612
BH1	12.8612
BH1	11.2917
BH1	11.2916
BH1	11.2783
BH1	11.2782
BH1	11.2775
BH1	11.2772
BH1	11.2768
BH1	13.0789
BH1	13.0794
BH1	13.1842
BH1	13.1838
BH1	13.1834
BH1	13.1825
BH1	13.1815
BH1	14.7567
BH1	14.7553
BH1	14.2006
BH1	14.1987
BH1	14.1989
BH1	14.1989
BH1	14.1991
BH1	13.6492
BH1	13.6501
BH1	14.238
BH1	14.2386
BH1	14.2386
BH1	14.2384
BH1	14.2374
BH1	11.7652
BH1	11.7645
BH1	11.2684
BH1	11.2691
BH1	11.2691
BH1	11.2679
BH1	11.2684
BH1	11.9822
BH1	11.9809
BH1	12.2704
BH1	12.269
BH1	12.2687
BH1	12.2685
BH1	12.2675
BH1	11.9723
BH1	11.9709
BH1	12.0253
BH1	12.0249
BH1	12.0253
BH1	12.0263
BH1	12.026
BH1	13.1566
BH1	13.1564
BH1	13.133
BH1	13.1326
BH1	13.1328
BH1	13.1318
BH1	13.1311
BH1	11.2125
BH1	11.212
BH1	11.3006
BH1	11.3014
BH1	11.2997
BH1	11.3002
BH1	11.2997
BH1	10.4515
BH1	10.4511
BH1	10.4577
BH1	10.4573
BH1	10.4579
BH1	10.4582
BH1	10.4589
BH1	13.2697
BH1	13.2701
BH1	13.0979
BH1	13.0979
BH1	13.0975
BH1	13.0973
BH1	13.0967
BH1	9.25507
BH1	9.25396
BH1	9.25188
BH1	9.25199
BH1	9.25171
BH1	9.2515
BH1	9.25136
BH1	12.9414
BH1	12.941
BH1	13.1147
BH1	13.1145
BH1	13.1137
BH1	13.1143
BH1	13.113
BH1	13.2511
BH1	13.2502
BH1	13.223
BH1	13.2227
BH1	13.2229
BH1	13.2233
BH1	13.2231
BH1	14.2652
BH1	14.2659
BH1	13.8816
BH1	13.8831
BH1	13.8828
BH1	13.8837
BH1	13.8841
BH1	11.6559
BH1	11.6562
BH1	11.8532
BH1	11.8534
BH1	11.8536
BH1	11.8535
BH1	11.8545
BH1	11.8101
BH1	11.8112
BH1	11.7627
BH1	11.7623
BH1	11.7622
BH1	11.761
BH1	11.761
BH1	12.3052
BH1	12.3052
BH1	12.4208
BH1	12.4203
BH1	12.4208
BH1	12.4198
BH1	12.4196
BH1	12.6926
BH1	12.692
BH1	12.6325
BH1	12.6325
BH1	12.6323
BH1	12.632
BH1	12.631
BH1	12.5875
BH1	12.5871
BH1	12.3158
BH1	12.3168
BH1	12.3154
BH1	12.316
BH1	12.3154
BH1	11.1608
BH1	11.16
BH1	11.4033
BH1	11.4032
BH1	11.4035
BH1	11.4033
BH1	11.4026
BH1	12.5646
BH1	12.5654
BH1	12.8681
BH1	12.8677
BH1	12.8679
BH1	12.8691
BH1	12.869
BH1	10.9695
BH1	10.9697
BH1	10.5039
BH1	10.5041
BH1	10.5041
BH1	10.5042
BH1	10.5046
BH1	12.9343
BH1	12.9346
BH1	13.2388
BH1	13.2393
BH1	13.2396
BH1	13.2405
BH1	13.2394
BH1	12.1876
BH1	12.1866
BH1	12.583
BH1	12.5826
BH1	12.5824
BH1	12.5814
BH1	12.5815
BH1	11.446
BH1	11.4461
BH1	11.0281
BH1	11.0292
BH1	11.0286
BH1	11.0297
BH1	11.0301
BH1	8.97664
BH1	8.97602
BH1	8.98935
BH1	8.9896
BH1	8.98985
BH1	8.98898
BH1	8.9887
BH1	12.8296
BH1	12.8294
BH1	12.8133
BH1	12.8131
BH1	12.8126
BH1	12.8128
BH1	12.8132
BH1	11.4996
BH1	11.4995
BH1	11.8629
BH1	11.8639
BH1	11.864
BH1	11.8642
BH1	11.8649
BH1	11.7786
BH1	11.7792
BH1	12.0199
BH1	12.02
BH1	12.0206
BH1	12.02
BH1	12.0193
BH1	12.7318
BH1	12.7312
BH1	13.2688
BH1	13.2676
BH1	13.2661
BH1	13.2666
BH1	13.2659
BH1	13.6732
BH1	13.6734
BH1	13.4804
BH1	13.4813
BH1	13.4818
BH1	13.481
BH1	13.4808
BH1	12.8551
BH1	12.8564
BH1	12.9183
BH1	12.92
BH1	12.9185
BH1	12.9175
BH1	12.9179
BH1	14.3046
BH1	14.3044
BH1	14.9967
BH1	14.9965
BH1	14.997
BH1	14.9958
BH1	14.9972
BH1	13.4839
BH1	13.4847
BH1	13.2543
BH1	13.2547
BH1	13.256
BH1	13.2547
BH1	13.2545
BH1	17.5657
BH1	17.5651
BH1	17.0479
BH1	17.0479
BH1	17.0479
BH1	17.0473
BH1	17.0486
BH1	14.7287
BH1	14.7269
BH1	14.9395
BH1	14.939
BH1	14.9387
BH1	14.9395
BH1	14.94
BH1	13.5895
BH1	13.5886
BH1	13.5229
BH1	13.5219
BH1	13.5224
BH1	13.5241
BH1	13.524
BH1	11.5555
BH1	11.5554
BH1	11.4833
BH1	11.4838
BH1	11.482
BH1	11.4822
BH1	11.4821
BH1	16.5808
BH1	16.5792
BH1	16.6481
BH1	16.6489
BH1	16.6465
BH1	16.647
BH1	16.6455
BH1	15.4115
BH1	15.4115
BH1	15.2535
BH1	15.2528
BH1	15.2509
BH1	15.2514
BH1	15.2509
BH1	15.7971
BH1	15.798
BH1	16.0276
BH1	16.0281
BH1	16.0281
BH1	16.0281
BH1	16.0286
BH1	14.3773
BH1	14.3778
BH1	14.4539
BH1	14.4541
BH1	14.4554
BH1	14.4551
BH1	14.4572
BH1	14.8929
BH1	14.8934
BH1	15.001
BH1	15.0005
BH1	15.0012
BH1	15.0031
BH1	15.0021
BH1	17.8933
BH1	17.8914
BH1	17.9163
BH1	17.915
BH1	17.9152
BH1	17.9133
BH1	17.9127
BH1	16.8032
BH1	16.8008
BH1	16.692
BH1	16.6925
BH1	16.6923
BH1	16.6928
BH1	16.6916
BH1	14.3177
BH1	14.317
BH1	14.5147
BH1	14.514
BH1	14.5138
BH1	14.5138
BH1	14.5147
BH1	15.5471
BH1	15.5476
BH1	15.6925
BH1	15.6937
BH1	15.6928
BH1	15.6923
BH1	15.6918
BH1	15.9051
BH1	15.9036
BH1	15.8292
BH1	15.829
BH1	15.8287
BH1	15.8287
BH1	15.8291
BH1	17.189
BH1	17.1877
BH1	16.9364
BH1	16.9351
BH1	16.9357
BH1	16.9364
BH1	16.9346
BH1	13.69
BH1	13.6905
BH1	12.8853
BH1	12.8844
BH1	12.884
BH1	12.8832
BH1	12.8819
BH1	14.163
BH1	14.1617
BH1	14.5918
BH1	14.5923
BH1	14.5928
BH1	14.5921
BH1	14.5926
BH1	14.7679
BH1	14.7675
BH1	14.8811
BH1	14.8818
BH1	14.883
BH1	14.8844
BH1	14.8849
BH1	13.7833
BH1	13.7835
BH1	13.4631
BH1	13.4629
BH1	13.4631
BH1	13.4633
BH1	13.4627
BH1	13.0398
BH1	13.0388
BH1	12.8895
BH1	12.8889
BH1	12.8881
BH1	12.8883
BH1	12.8885
BH1	14.0331
BH1	14.0342
BH1	13.8798
BH1	13.8799
BH1	13.8815
BH1	13.881
BH1	13.8812
BH1	12.6737
BH1	12.6745
BH1	12.7563
BH1	12.7565
BH1	12.7565
BH1	12.7563
BH1	12.7565
BH1	14.1345
BH1	14.1341
BH1	14.086
BH1	14.0851
BH1	14.0853
BH1	14.0858
BH1	14.0851
BH1	14.5696
BH1	14.5699
BH1	14.7707
BH1	14.7704
BH1	14.7702
BH1	14.77
BH1	14.7685
BH1	11.0448
BH1	11.0435
BH1	11.1198
BH1	11.1193
BH1	11.1183
BH1	11.1181
BH1	11.1159
BH1	12.3102
BH1	12.3098
BH1	12.1164
BH1	12.1173
BH1	12.1183
BH1	12.1188
BH1	12.1188
BH1	11.7542
BH1	11.7537
BH1	11.5637
BH1	11.5648
BH1	11.5655
BH1	11.5663
BH1	11.5653
BH1	9.66545
BH1	9.6653
BH1	9.69915
BH1	9.69889
BH1	9.69945
BH1	9.69877
BH1	9.69847
BH1	12.9946
BH1	12.9931
BH1	12.7884
BH1	12.7882
BH1	12.7893
BH1	12.7886
BH1	12.7897
BH1	11.6781
BH1	11.6778
BH1	11.8158
BH1	11.8161
BH1	11.8167
BH1	11.8179
BH1	11.8172
BH1	11.8172
BH1	11.8166
BH1	12.0733
BH1	12.0713
BH1	12.0708
BH1	12.0705
BH1	12.0703
BH1	12.3223
BH1	12.3221
BH1	11.9395
BH1	11.94
BH1	11.94
BH1	11.9398
BH1	11.9396
BH1	10.964
BH1	10.9644
BH1	10.913
BH1	10.9133
BH1	10.9117
BH1	10.9119
BH1	10.9102
BH1	11.9042
BH1	11.904
BH1	11.9145
BH1	11.9141
BH1	11.9144
BH1	11.9153
BH1	11.917
BH1	13.4009
BH1	13.4013
BH1	13.5877
BH1	13.588
BH1	13.5865
BH1	13.5876
BH1	13.586
BH1	11.8129
BH1	11.8126
BH1	11.5374
BH1	11.5368
BH1	11.5362
BH1	11.5375
BH1	11.5375
BH1	12.8987
BH1	12.8991
BH1	13.2751
BH1	13.2753
BH1	13.2744
BH1	13.2751
BH1	13.2753
BH1	12.1232
BH1	12.1232
BH1	11.9245
BH1	11.9233
BH1	11.9234
BH1	11.9229
BH1	11.9224
BH1	14.4037
BH1	14.4048
BH1	14.0088
BH1	14.009
BH1	14.0083
BH1	14.0085
BH1	14.0095
BH1	13.9516
BH1	13.9513
BH1	14.3885
BH1	14.3888
BH1	14.389
BH1	14.3874
BH1	14.3888
BH1	13.7888
BH1	13.7895
BH1	13.8889
BH1	13.8884
BH1	13.8902
BH1	13.8898
BH1	13.8904
BH1	15.4058
BH1	15.4051
BH1	15.6123
BH1	15.6106
BH1	15.6109
BH1	15.6106
BH1	15.6098
BH1	13.0939
BH1	13.0928
BH1	13.2726
BH1	13.272
BH1	13.2723
BH1	13.273
BH1	13.2732
BH1	13.5232
BH1	13.5234
BH1	13.7987
BH1	13.7987
BH1	13.7978
BH1	13.7978
BH1	13.7981
BH1	12.2406
BH1	12.2407
BH1	12.4867
BH1	12.4867
BH1	12.4877
BH1	12.4872
BH1	12.4887
BH1	12.9041
BH1	12.9035
BH1	12.547
BH1	12.5457
BH1	12.547
BH1	12.5467
BH1	12.548
BH1	15.1802
BH1	15.1802
BH1	14.8603
BH1	14.8589
BH1	14.86
BH1	14.8596
BH1	14.86
BH1	11.3666
BH1	11.3659
BH1	11.8915
BH1	11.891
BH1	11.8914
BH1	11.8909
BH1	11.8916
BH1	11.1795
BH1	11.1801
BH1	11.1493
BH1	11.1487
BH1	11.1501
BH1	11.1497
BH1	11.1498
BH1	11.2757
BH1	11.2756
BH1	11.0572
BH1	11.0554
BH1	11.0563
BH1	11.0543
BH1	11.0547
BH1	11.8939
BH1	11.8938
BH1	12.3553
BH1	12.3555
BH1	12.3549
BH1	12.356
BH1	12.3549
BH1	14.2358
BH1	14.2361
BH1	14.11
BH1	14.1098
BH1	14.1098
BH1	14.1097
BH1	14.109
BH1	11.5403
BH1	11.5408
BH1	11.1458
BH1	11.1468
BH1	11.1471
BH1	11.1459
BH1	11.1461
BH1	10.3633
BH1	10.3641
BH1	11.0625
BH1	11.0629
BH1	11.0634
BH1	11.0628
BH1	11.062
BH1	13.3095
BH1	13.3087
BH1	12.9654
BH1	12.9648
BH1	12.9622
BH1	12.9617
BH1	12.96
BH1	13.138
BH1	13.1374
BH1	14.3061
BH1	14.3077
BH1	14.3067
BH1	14.3067
BH1	14.3072
BH1	10.2265
BH1	10.2277
BH1	10.1224
BH1	10.1226
BH1	10.1218
BH1	10.1229
BH1	10.1227
BH1	13.4013
BH1	13.4025
BH1	14.1067
BH1	14.1059
BH1	14.108
BH1	14.1079
BH1	14.1088
BH1	15.1784
BH1	15.1789
BH1	13.8816
BH1	13.8818
BH1	13.882
BH1	13.8809
BH1	13.8818
BH1	15.5928
BH1	15.5913
BH1	15.8685
BH1	15.8693
BH1	15.8681
BH1	15.8674
BH1	15.8661
BH1	15.5984
BH1	15.5988
BH1	16.3209
BH1	16.3204
BH1	16.3209
BH1	16.3206
BH1	16.3201
BH1	18.1425
BH1	18.1416
BH1	17.6946
BH1	17.6962
BH1	17.6967
BH1	17.6965
BH1	17.6973
BH1	16.5806
BH1	16.5819
BH1	16.7796
BH1	16.7799
BH1	16.7802
BH1	16.7802
BH1	16.7796
BH1	15.2291
BH1	15.2297
BH1	14.4833
BH1	14.4835
BH1	14.4839
BH1	14.483
BH1	14.4832
BH1	15.3201
BH1	15.3186
BH1	15.9598
BH1	15.9598
BH1	15.9606
BH1	15.959
BH1	15.9592
BH1	16.7748
BH1	16.7748
BH1	16.2912
BH1	16.2916
BH1	16.2912
BH1	16.2921
BH1	16.2914
BH1	15.1381
BH1	15.1374
BH1	15.0528
BH1	15.0541
BH1	15.0543
BH1	15.0539
BH1	15.0545
BH1	14.2329
BH1	14.2339
BH1	13.856
BH1	13.856
BH1	13.8562
BH1	13.8571
BH1	13.8589
BH1	16.0294
BH1	16.0294
BH1	16.9505
BH1	16.9492
BH1	16.9505
BH1	16.9489
BH1	16.9508
BH1	17.752
BH1	17.7507
BH1	17.9717
BH1	17.9706
BH1	17.9694
BH1	17.9694
BH1	17.9713
BH1	18.8138
BH1	18.8141
BH1	17.67
BH1	17.669
BH1	17.6695
BH1	17.6714
BH1	17.6714
BH1	14.1455
BH1	14.1461
BH1	14.9575
BH1	14.9574
BH1	14.9582
BH1	14.9571
BH1	14.9566
BH1	14.7931
BH1	14.7919
BH1	15.0669
BH1	15.0672
BH1	15.0667
BH1	15.0655
BH1	15.0659
BH1	14.5107
BH1	14.5113
BH1	13.9388
BH1	13.9401
BH1	13.9392
BH1	13.9389
BH1	13.9399
BH1	13.2695
BH1	13.2693
BH1	13.1894
BH1	13.1892
BH1	13.1898
BH1	13.1897
BH1	13.1923
BH1	11.7825
BH1	11.7831
BH1	12.1286
BH1	12.1282
BH1	12.1278
BH1	12.1282
BH1	12.1271
BH1	14.1418
BH1	14.1413
BH1	13.8775
BH1	13.8752
BH1	13.875
BH1	13.8742
BH1	13.8744
BH1	14.1094
BH1	14.1106
BH1	14.5284
BH1	14.5289
BH1	14.5273
BH1	14.5266
BH1	14.5261
BH1	15.8528
BH1	15.8531
BH1	15.6697
BH1	15.6694
BH1	15.6704
BH1	15.6694
BH1	15.6704
BH1	14.1181
BH1	14.1193
BH1	14.0927
BH1	14.0932
BH1	14.0955
BH1	14.0959
BH1	14.0962
BH1	18.1223
BH1	18.121
BH1	17.9863
BH1	17.9863
BH1	17.9869
BH1	17.987
BH1	17.9872
BH1	15.8897
BH1	15.8879
BH1	16.5375
BH1	16.5356
BH1	16.5362
BH1	16.5357
BH1	16.5343
BH1	14.8071
BH1	14.806
BH1	13.9154
BH1	13.9145
BH1	13.9139
BH1	13.9136
BH1	13.9155
BH1	14.3288
BH1	14.3275
BH1	14.0909
BH1	14.0918
BH1	14.0929
BH1	14.0942
BH1	14.0961
BH1	15.7968
BH1	15.7953
BH1	16.3301
BH1	16.3283
BH1	16.328
BH1	16.3299
BH1	16.3283
BH1	15.0998
BH1	15.0994
BH1	14.7485
BH1	14.7469
BH1	14.7479
BH1	14.7482
BH1	14.7475
BH1	14.0126
BH1	14.0136
BH1	14.3629
BH1	14.3632
BH1	14.3643
BH1	14.3638
BH1	14.3642
BH1	12.824
BH1	12.8236
BH1	12.0655
BH1	12.0659
BH1	12.0669
BH1	12.0657
BH1	12.0655
BH1	14.5677
BH1	14.5672
BH1	14.2925
BH1	14.2923
BH1	14.2921
BH1	14.2907
BH1	14.2912
BH1	11.9656
BH1	11.964
BH1	12.2846
BH1	12.2846
BH1	12.2838
BH1	12.283
BH1	12.2826
BH1	11.477
BH1	11.4757
BH1	11.5109
BH1	11.511
BH1	11.5112
BH1	11.5118
BH1	11.5117
BH1	10.6837
BH1	10.6836
BH1	10.4214
BH1	10.4211
BH1	10.4199
BH1	10.4192
BH1	10.4191
BH1	12.6415
BH1	12.6417
BH1	12.968
BH1	12.9683
BH1	12.9668
BH1	12.967
BH1	12.9669
BH1	13.3642
BH1	13.3652
BH1	12.6582
BH1	12.658
BH1	12.6572
BH1	12.6562
BH1	12.6548
BH1	10.4343
BH1	10.434
BH1	10.837
BH1	10.8363
BH1	10.8349
BH1	10.8356
BH1	10.8354
BH1	14.3956
BH1	14.3953
BH1	14.2836
BH1	14.2853
BH1	14.286
BH1	14.2862
BH1	14.286
BH1	12.0284
BH1	12.0301
BH1	12.6048
BH1	12.6048
BH1	12.6047
BH1	12.6041
BH1	12.6033
BH1	12.0519
BH1	12.0515
BH1	12.2489
BH1	12.248
BH1	12.2488
BH1	12.248
BH1	12.2484
BH1	11.1695
BH1	11.17
BH1	11.1043
BH1	11.105
BH1	11.1054
BH1	11.1058
BH1	11.1055
BH1	15.0397
BH1	15.0392
BH1	14.9969
BH1	14.9972
BH1	14.9972
BH1	14.9965
BH1	14.9965
BH1	13.8813
BH1	13.8811
BH1	13.9913
BH1	13.9902
BH1	13.9902
BH1	13.9891
BH1	13.9893
BH1	14.7643
BH1	14.7631
BH1	14.709
BH1	14.708
BH1	14.7073
BH1	14.7073
BH1	14.7068
BH1	14.0442
BH1	14.0438
BH1	14.3382
BH1	14.3382
BH1	14.3387
BH1	14.3395
BH1	14.3401
BH1	11.064
BH1	11.0646
BH1	10.9733
BH1	10.9732
BH1	10.9729
BH1	10.9721
BH1	10.9724
BH1	13.3131
BH1	13.3116
BH1	13.4215
BH1	13.4207
BH1	13.4199
BH1	13.4186
BH1	13.4178
BH1	13.4281
BH1	13.429
BH1	13.6395
BH1	13.6393
BH1	13.639
BH1	13.6401
BH1	13.6403
BH1	13.0757
BH1	13.0761
BH1	12.9884
BH1	12.9882
BH1	12.9876
BH1	12.9874
BH1	12.9874
BH1	12.4267
BH1	12.4287
BH1	12.3123
BH1	12.3137
BH1	12.3133
BH1	12.3125
BH1	12.3137
BH1	13.1437
BH1	13.1431
BH1	12.9152
BH1	12.9134
BH1	12.9126
BH1	12.9111
BH1	12.9123
BH1	13.0435
BH1	13.0449
BH1	12.9675
BH1	12.9677
BH1	12.9671
BH1	12.9675
BH1	12.9673
BH1	11.9039
BH1	11.9037
BH1	11.8655
BH1	11.8636
BH1	11.863
BH1	11.8627
BH1	11.8614
BH1	14.6055
BH1	14.606
BH1	14.7032
BH1	14.7032
BH1	14.7044
BH1	14.7057
BH1	14.7067
BH1	16.9647
BH1	16.9626
BH1	16.4078
BH1	16.408
BH1	16.4056
BH1	16.4053
BH1	16.4065
BH1	16.7397
BH1	16.7399
BH1	17.2074
BH1	17.2059
BH1	17.2062
BH1	17.2067
BH1	17.2069
BH1	16.6181
BH1	16.6193
BH1	16.2396
BH1	16.24
BH1	16.2403
BH1	16.2388
BH1	16.2382
BH1	16.765
BH1	16.7622
BH1	17.2074
BH1	17.2054
BH1	17.203
BH1	17.2018
BH1	17.201
BH1	17.5265
BH1	17.5251
BH1	17.5227
BH1	17.5221
BH1	17.5224
BH1	17.5219
BH1	17.5241
BH1	17.9531
BH1	17.9544
BH1	17.5211
BH1	17.5214
BH1	17.5219
BH1	17.5223
BH1	17.5245
BH1	14.3634
BH1	14.3632
BH1	15.1896
BH1	15.189
BH1	15.1894
BH1	15.1906
BH1	15.1906
BH1	20.7043
BH1	20.702
BH1	20.9065
BH1	20.9042
BH1	20.9035
BH1	20.9029
BH1	20.9012
BH1	16.8376
BH1	16.8368
BH1	16.3855
BH1	16.3852
BH1	16.3839
BH1	16.3846
BH1	16.384
BH1	18.0493
BH1	18.0505
BH1	17.4838
BH1	17.4849
BH1	17.4855
BH1	17.484
BH1	17.484
BH1	18.0079
BH1	18.0073
BH1	18.4666
BH1	18.4657
BH1	18.4651
BH1	18.4639
BH1	18.4618
BH1	19.7158
BH1	19.7149
BH1	19.843
BH1	19.843
BH1	19.8442
BH1	19.8452
BH1	19.8455
BH1	15.0107
BH1	15.0107
BH1	15.0244
BH1	15.0248
BH1	15.0253
BH1	15.026
BH1	15.0251
BH1	12.7415
BH1	12.7417
BH1	12.2681
BH1	12.2681
BH1	12.2669
BH1	12.2673
BH1	12.2657
BH1	12.5274
BH1	12.5262
BH1	12.5134
BH1	12.5126
BH1	12.5095
BH1	12.5057
BH1	12.5034
BH1	12.8949
BH1	12.893
BH1	11.7927
BH1	11.7905
BH1	11.7883
BH1	11.7865
BH1	11.7854
BH1	11.6524
BH1	11.6531
BH1	11.7922
BH1	11.7929
BH1	11.7931
BH1	11.7925
BH1	11.7932
BH1	10.8303
BH1	10.8314
BH1	10.6473
BH1	10.6463
BH1	10.6451
BH1	10.6444
BH1	10.6431
BH1	11.9574
BH1	11.9565
BH1	12.1141
BH1	12.1131
BH1	12.1123
BH1	12.1123
BH1	12.1108
BH1	11.6257
BH1	11.6255
BH1	11.2947
BH1	11.2949
BH1	11.2933
BH1	11.2931
BH1	11.2908
BH1	12.6791
BH1	12.6795
BH1	13.2997
BH1	13.3004
BH1	13.3004
BH1	13.3014
BH1	13.3026
BH1	15.1685
BH1	15.1706
BH1	14.8737
BH1	14.8749
BH1	14.876
BH1	14.8746
BH1	14.876
BH1	14.262
BH1	14.262
BH1	14.2178
BH1	14.2169
BH1	14.2169
BH1	14.2158
BH1	14.2161
BH1	14.2149
BH1	14.2143
BH1	14.1346
BH1	14.1324
BH1	14.1319
BH1	14.1307
BH1	14.1318
BH1	12.8333
BH1	12.8347
BH1	12.8853
BH1	12.8865
BH1	12.8867
BH1	12.8871
BH1	12.8872
BH1	11.2021
BH1	11.2028
BH1	11.6289
BH1	11.6274
BH1	11.6272
BH1	11.6247
BH1	11.6231
BH1	16.5456
BH1	16.5446
BH1	16.581
BH1	16.5791
BH1	16.5744
BH1	16.5718
BH1	16.57
BH1	14.8728
BH1	14.8697
BH1	14.6843
BH1	14.6843
BH1	14.6829
BH1	14.6815
BH1	14.6816
BH1	13.4853
BH1	13.4848
BH1	13.211
BH1	13.2103
BH1	13.2097
BH1	13.2103
BH1	13.2104
BH1	15.283
BH1	15.2833
BH1	15.618
BH1	15.6185
BH1	15.6175
BH1	15.6164
BH1	15.6182
BH1	16.1076
BH1	16.1062
BH1	15.9692
BH1	15.9686
BH1	15.9672
BH1	15.9672
BH1	15.9662
BH1	18.2023
BH1	18.2038
BH1	18.2411
BH1	18.2374
BH1	18.236
BH1	18.2353
BH1	18.2312
BH1	16.7423
[truncated: 16,604 more rows]
